# Supplementary material for: A Population-Based Cross-Sectional Study of the Association between Liver Enzymes and Lipid Levels
Source: Int J Hepatol. 2018 Jun 3;2018:1286170. doi: 10.1155/2018/1286170 (PMC6008685; doi:10.1155/2018/1286170)
Supplement: Supplementary Materials — The Supplemental Tables 1(a) and 1(b) illustrate the association of demographic characteristics such as age, gender, and race/ethnicity with different lipid biomarkers such as LDL, HDL, and triglyceride ranges. The Supplemental Table 1(c) highlights the association of demographic characteristics with ALT and AST. [file 1286170.f1.zip]

Archive with 4 entries (3 files):
- 1286170.f1/
- 1286170.f1/supplimentary - table 1a may 6, 2018_IJH_2308486.doc
- 1286170.f1/supplimentary - table 1b may 6, 2018_IJH_2308487.doc
- 1286170.f1/supplimentary -table 1c may 6, 2018_IJH_2308488.doc
